# Supplementary material for: Integrative Bioinformatics Analysis Revealed Mitochondrial Dysfunction-Related Genes Underlying Intervertebral Disc Degeneration
Source: Oxid Med Cell Longev. 2022 Oct 11;2022:1372483. doi: 10.1155/2022/1372483 (PMC9578809; doi:10.1155/2022/1372483)
Supplement: Supplementary Materials — Table S1 GO terms enrichment analysis. Table S2 KEGG pathway enrichment analysis. Table S3 GSEA. [file 1372483.f1.zip]

Archive with 3 entries (3 files):
- Supplementary material Table S1.docx
- Supplementary material Table S2.docx
- Supplementary material Table S3.docx
